# Supplementary material
Source: MDPI journal article supplement (https://www.mdpi.com/2311-7524/10/5/478)
Supplement: s1 [file s1]

**Table S1.** The primer sequence of genes used in qRT-PCR.

| Genes             | Gene ID               | Primer sequence (5'→3')                      |
|-------------------|-----------------------|----------------------------------------------|
| <i>CsHsp70-1</i>  | <i>CsaV3_2G009170</i> | AAGGAGAGCGAGCAAGAACC<br>ATCATCACCCATCGGAGCAC |
| <i>CsHsp70-2</i>  | <i>CsaV3_2G011210</i> | ATGTCGGAGGTGGATGAGGA<br>TAATGAAGCGGCAGTGGGTT |
| <i>CsHsp70-3</i>  | <i>CsaV3_3G013380</i> | TGACATGCTCTCTGGTGCTG<br>CTGTGACACCCCTCCTCCTA |
| <i>CsHsp70-4</i>  | <i>CsaV3_3G022450</i> | GGAATGACCAAGGCTGAGCT<br>GCCAACTAAACTCCCCAGCT |
| <i>CsHsp70-5</i>  | <i>CsaV3_4G014660</i> | ACGATGCACAGAGACAAGCA<br>AAGATGCTTTGCGCCACTTG |
| <i>CsHsp70-6</i>  | <i>CsaV3_4G024840</i> | GGAACCCGTCGAGAAGTGTT<br>GTGGTCTTGTCTTCGGCAGA |
| <i>CsHsp70-7</i>  | <i>CsaV3_4G032260</i> | GCGTACCAAAATTGCAGGCA<br>TCCACAGTTGCATTGGACGA |
| <i>CsHsp70-8</i>  | <i>CsaV3_5G001960</i> | GACTGCAGGAACCTCGGAAA<br>ACCTTTGGTAGACTGCGGTG |
| <i>CsHsp70-9</i>  | <i>CsaV3_5G026450</i> | GAAGTCAACTGCCGGAGACA<br>GCTGTTTCGAGACCAAGGGA |
| <i>CsHsp70-10</i> | <i>CsaV3_5G026520</i> | TCGGTGATGCTGCCAAGAAT<br>GGGATCACCTTGAATGGCCA |
| <i>CsHsp70-11</i> | <i>CsaV3_7G024760</i> | ATGGTATCCCTCCTGCACCT<br>CTAGAGGCTGTTGCTTGGCT |
| <i>CsHsp70-12</i> | <i>CsaV3_7G033150</i> | GCGTTACCTGGGTGAGTTGA<br>TCAAAGGTGCCACAGGGTTT |
| <i>CsPIP1;1</i>   | <i>Csa5M199270.1</i>  | TGTGATGCAATGCCTTGGTG<br>GTGTAACCGTCGCTCACAAC |
| <i>CsPIP1;2</i>   | <i>Csa5M198770.1</i>  | GGGAACACGTGTAAGACCGT<br>ACACTGCAAATCCGATGGGT |
| <i>CsPIP1;3</i>   | <i>Csa5M153020.1</i>  | GAGTCAACCGATCTCCGTCC<br>CCGGATTAATGTGCCACCT  |
| <i>CsPIP1;4</i>   | <i>Csa5M199280.1</i>  | ATTAACCCGGCGGTCACTTT<br>CCCACGCTTTGTCTTGTG   |
| <i>CsPIP1;5</i>   | <i>Csa6M445090.1</i>  | TTGGTCTGTTCTTGGGTCCG<br>AACATCACTGCTGAGCCGAA |
| <i>CsPIP1;6</i>   | <i>Csa3M739030.1</i>  | TGGGTCTTCGGGGGTATGAT<br>CAAGGCTCGGACCAACGATA |
| <i>CsPIP2;1</i>   | <i>Csa6M445130.1</i>  | CGCTGGGATTTCTGGTGAGT<br>AACACGGCAAACCCAATTGG |
| <i>CsPIP2;2</i>   | <i>Csa6M445120.1</i>  | GCGGCGAGAAATTCACATCC<br>CAGCTCTACCAACGACACT  |
| <i>CsPIP2;3</i>   | <i>Csa6M445140.1</i>  | CAGCGGTGACTTTTGGGTTG<br>CTGGTCATCCCATGGCTTGT |

|                 |                      |                                              |
|-----------------|----------------------|----------------------------------------------|
| <i>CsPIP2;4</i> | <i>Csa6M140850.1</i> | ATCGCCACTCTCCTCTTCCT<br>AACACGGCAAACCCAATTGG |
| <i>CsPIP2;5</i> | <i>Csa6M405320.1</i> | TGCTTGGGCTTTTGGAGGAA<br>GCACAATCTCCGCGGTAAAC |
| <i>CsPIP2;6</i> | <i>Csa6M445150.1</i> | CGGCATCAACCCAGCTAGAA<br>GAGGGAGGAGGGAGGGTATC |
| <i>CsPIP2;7</i> | <i>Csa5M623360.1</i> | TTGCTCCCCTATGGCCAAAG<br>GAGGGGTCGAGAAGAGGTCT |
| <i>CsPIP2;8</i> | <i>Csa7M014450.1</i> | GGAGCCAACGCCGTTAATTC<br>ACCCACCCAGAAGATCCACT |

---
